# Supplementary material
Source: publisher figshare collection journal article supplement (https://diabetesjournals.figshare.com/ndownloader/files/22034682)
Supplement: Supplementary file 1 [file 22034682]

## Sheet: SAVE diabetes substudy
Austin Hospital	Maree Barnes
Beijing Haidian Hospital	Fengchun Yu	Xiaomei Meng, Wei Liu, Xinping Chen, Xiaomei Tang
Beijing Police Hospital	Gaohui Xiao
Beijing Shijitan Hospital (General Railway Hospital) - Department of Neurology	Maolin He	Jingjing Liu
Caulfield Clinical Trials Centre	Matt Naughton	Michelle Hooy, Sophie Yorkston
Christchurch Hospital	Michael Hlavac	Michael James Epton, Malina Kate Storer, Julie Margaret Cook
Concord Repatriation General Hospital	Alastair Corbett	Rosie Portley
Dunedin Hospital	Ben Brockway	Jan Cowan, D. Robin Taylor, Emma Cox, Rochelle Palmay
ECRU (Box Hill Hospital)	Alan Young	Sue Del Sasso, Irina Shinkarksy, Ilana Shinkarksy, Francis Thien, Denise O'Driscoll, Angela Anniss
First Affiliated Hospital of Chinese Medical University	Wei Wang	Hui Shen
Flinders Medical Centre	Derek Chew	Frances Kissajukian, Kate Luscombe, Fiona Wollaston
Fuwai Hospital	Zhihong Liu
Guangdong Provincial People's Hospital	Qiong Ou
Hejian Municipal People's Hospital	Baoliang Du	Yanxia Wang, Yanhua Guo, Wei Dong, Lixin Wu, Kunlun Yu, Shengli Wang, Junyan Shi
Hospital Universitario - Universidade de Sao Paulo	Luciano Drager	Gabriela A Souza, Daniel B C Queiróz
Hutt Hospital	Katherine Ferrier	Judy Dewar, Ria Kleintjes, Jo Kovacs, Angela Campbell, Alister Neill
Inner Mongolia Baotou City Central Hospital	Yuechun Li	Xiue Li, Ruichun Pan, Hui Xue
Instituto Dante Pazzanese de Cardiologia	Celso Amodeo	Juliana Silva, Renata Depizzol, Dalete de Andrade, Adriana Bertolami, Carolina Gonzaga
Instituto do Coracao (INCOR)	Geraldo Lorenzi-Filho	Gabriela A Souza, Daniel B C Queiróz
Instituto do Sono - AFIP (Associacao Fundo de Incentivo a Psicofarmacologia)	Lia Bittencourt	Carolina Ferreira, Madga Bignotto
Jiangsu Provincial Hopital of State Organ (Cardiology Department)	Zhiqing Pan	Yu Dou, Meiyu Zhu
Jiangsu Provincial Hospital of State Organ	Gan Lu
Lyell McEwin Hospital	Margaret Arstall, William Jeffries	Naomi Lamberts
Monash Medical Centre	Garun Hamilton	Joanne McKenzie
Nanjing Jiangning Hospital	Xiuwei Zhang
Peking Union Medical College Hospital - Respiratory Department	Yi Xiao	Rong Huang
Repatriation General Hospital	Doug McEvoy	Nick Antic, Denzil Paul, Amanda McKenna
Royal Prince Alfred Hospital	Craig Anderson	Candice Delcourt, Cheryl Carcel, Elizabeth Ray, Theodora Paraskevaidis, Sabrina Small
Shanghai Huadong Hospital	Huili Zhu
Shanghai Pulmonary Hospital	Yulu Liang
Shanghai Ruijin Hospital	Min Li
Shanghai Shidong Hospital	Xinbing Liu	Minpeng Wang
Sino-Japan Friendship Hospital	Jiangtao Lin	YiMing Li
Tauranga Hospital	Neil Graham	Mary Elizabeth Molloy
The 1st Affiliated Hospital of Baotou Medical College	Li'e Wu	Xia Guo, Junping Wu
The Fifth Affiliated Hospital, Sun Yat -Sen University	Zhendong Li	Xiaohua Xu
The First Affiliated Hospital of Guangzhou Medical College (Respiration Disease)	Yuangming Luo	Zhihui Qiu
The First Affiliated Hospital of Nanjing Medical University	Xilong Zhang
The First People's Hospital of Changzhou	Chong Li	Wanda Peng
The First People's Hospital of Foshan	Guocui Zhen
The People's Hospital of Guangxi Zhuang Autonomous Region	Jian Hong Liu
The Prince Charles Hospital	James Douglas	Nicola Dunn, Darren Walters, Ling Lan, Jane Mikli, Andrew Wong, Deanne Curtin, Jan Robinson
The Second Affiliated Hospital of Hebei Medical University	Liwen Tai	Huijuan Wang
The Second Affiliated Hospital of Soochow University	Rui Chen	Yanqiu Sun, Yanyu He
The Second Hospital of Shanxi Medical University	Bei Wang	Zhuda Liu, Hui Zhao, Xiaoling Gao, Yanfeng Fan
The Third Hospital of Hebei Medical University	Hanqiao Wang
Waikato Hospital	Cat Chang	Christine Tuffery, Sandra Hopping
WASDRI (Sir Charles Gairdner Hospital)	Nigel McArdle, Sutapa Mukherjee	Bernadett Boeing, David Hillman, Siobhan Clare Rea
Xinhua Hospital Affiliated to Shanghai Jiatong University School of Medicine	Xuejun Guo	Lianping Ren, Jinyuan Sun, Yiping Sun
Zhejiang Hospital	Guangyue Qin
Zhongshan Hospital Fudan University	Shanqun Li	Wenjing Li, Xiaodan Wu, Jing Zhou, Hong Jiang
Adelaide Institue for Sleep Health - Core Lab	Laura Bandick, Michaela O'Keefe, Jeremy Mercer, Mark Jurisevic, Samantha Mead
The George Institute - Sydney	Emma Heeley, Ruth Freed, Tina Cheung, Natalie Espinosa, Sarah Leighton, Tara Sasse, Michelle Leroux
The George Institute - Clinical -China	Shu Ying, Yuehan Zheng, Wei Wei, Hongyu Zhang, Jing Zhou, Haijing Jia, Meng Zhang, Buliang Cui, Hua Deng, Aiwu Song
SAVE Executive Committee	Doug McEvoy, Craig Anderson, Ron Grunstein, Jan Hedner, Shaoguang Huang, Geraldo Lorenzi-Filho, Bruce Neal, Lyle Palmer, Susan Redline, Jiguang Wang, Nanshan Zhong
